# Supplementary material for: Chalcogen-Varied Imidazolone Derivatives as Antibiotic Resistance Breakers in Staphylococcus aureus Strains
Source: MDPI journal article supplement (doi:10.3390/antibiotics12111618), 2023-11-11
Supplement: s1 [file s1]

# Imidazolone derivatives as antibiotic resistance breakers in *Staphylococcus aureus* strains

Karolina Witek, Aneta Kaczor, Ewa Żesławska, Sabina Podlewska, Małgorzata Anna Marć, Kinga Czarnota-Łydka, Wojciech Nitek, Gniewomir Latacz, Waldemar Tejchman, Markus Bischoff, Claus Jacob, Jadwiga Handzlik\*

## Supplementary

### Chemical Characteristics of the investigated compounds

*Chemical procedures to obtain compounds 11 and 21 (not published before)*

*Procedure of synthesis of methyl 2-(1'-((4-(4-nitrophenyl)piperazin-1-yl)butyl)-2',4'-dioxospiro[fluorene-9,5'-imidazolidin]-3'-yl)acetate hydrochloride (11)*

Commercially available 4-nitrophenylpiperazine (3 mmol), K<sub>2</sub>CO<sub>3</sub> (1.2g) and acetone (10 ml) were stirred for 30 min. Then a solution of the obtained before [23] methyl 2-(1'-(4-bromobutyl)-spiro(fluorene-9,5' -imidazolidine)-2',4'-dione-3'-yl)acetate (3 mmol, 1.37g) in acetone (12 ml) was added. The mixture was maintained at reflux for 8 h, left at room temperature for 15 h. The precipitate was filtrated off. The filtrate was concentrated to constant weight. The crude residue was purified by crystallization from EtOH to give a precipitate of the final compound (11).

*Procedure of synthesis of (Z)-5-benzylidene-3-(4-bromophenyl)-2-thioxothiazolidin-4-one (21)*

3-(4-bromophenyl)-2-((4-bromophenyl)imino)thiazolidin-4-one was boiled with benzaldehyde in a molar ratio 1:1 in the fivefold excess of acetic anhydride for 3-5 h. After cooling the precipitates were filtered off and recrystallized. Then obtained 5-((Z)-benzylidene)-3-(4-bromophenyl)-2-((4-bromophenyl)imino)thiazolidin-4-one was heated with a tenfold excess of dimethyl sulfate under nitrogen for 45-60 min at 120°C. The resulting syrups were dissolved in 25 cm<sup>3</sup> of absolute ethanol and were treated with hydrogen sulfide under nitrogen for 1.5-2 h. Nitrogen was purged for another 1 h to remove the excess of H<sub>2</sub>S which was absorbed in the solution of Pb(II) salt. The brightly red precipitates of 21 were filtered off, washed with absolute ethanol and recrystallized.

**Table S1.** Chemical characteristics of 7-21.

| Compound | Name, structure, formula and chemical characteristics<br>(LC/MS <sup>+</sup> or elemental analyses, purity%, <sup>1</sup> H-NMR)                                                                         | Ref  |
|----------|----------------------------------------------------------------------------------------------------------------------------------------------------------------------------------------------------------|------|
| 7        | (Z)-2-Amino-3-(3-(4-methylpiperazin-1-yl)propyl)-5-(naphthalen-2-ylmethylene)-3H-imidazol-4(5H)-one hydrochloride<br>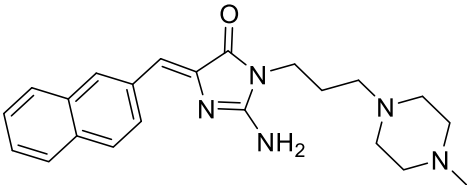 | [21] |

|    |                                                                                                                                                                                                                                                                                                                                                                                                                                                                                                                                                                                                                                                                                                                                                                                                                                          |      |
|----|------------------------------------------------------------------------------------------------------------------------------------------------------------------------------------------------------------------------------------------------------------------------------------------------------------------------------------------------------------------------------------------------------------------------------------------------------------------------------------------------------------------------------------------------------------------------------------------------------------------------------------------------------------------------------------------------------------------------------------------------------------------------------------------------------------------------------------------|------|
|    | <p><math>C_{22}H_{28}ClN_5O</math> MW 413.94.<br/> LC/MS±: purity &gt;99%; <math>t_R</math> = 3.34; (ESI) <math>m/z</math> <math>[M+H]^+</math> 378.28.<br/> <math>^1H</math>-NMR (DMSO-<math>d_6</math>) <math>\delta</math> [ppm]: 8.39–8.34 (m, 2H, Ar-5,8-H), 7.85–7.78 (m, 5H, <math>NH_2</math>, Ar-1,3,4-H), 7.47–7.45 (m, 2H, Ar-6,7-H), 6.50 (s, 1H, C = CH), 3.54 (t, <math>J</math> = 6.40Hz, N3-CH<math>_2</math>), 2.45–2.20 (m, 10H, Pip, Pip-CH<math>_2</math>), 2.09 (s, 3H, CH<math>_3</math>), 1.68 (qui, <math>J</math> = 6.40Hz, 2H, N-CH<math>_2</math>-CH<math>_2</math>)</p>                                                                                                                                                                                                                                      |      |
| 8  | <p>(Z)-2-Amino-3-(3-(4-methylpiperazin-1-yl)propyl)-5-(phenanthren-9-ylmethylene)-3H-imidazol-4(5H)-one hydrochloride</p> 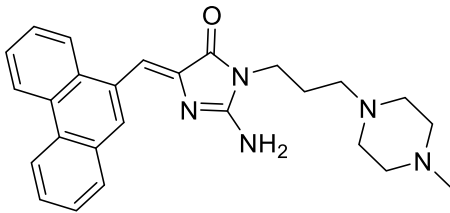 <p><math>C_{26}H_{30}ClN_5O</math> MW 464.00.<br/> LC/MS±: purity 99.00% <math>t_R</math> = 4.03, (ESI) <math>m/z</math> <math>[M+H]^+</math> 428.19.<br/> <math>^1H</math>-NMR (DMSO-<math>d_6</math>) <math>\delta</math> [ppm]: 8.89–8.86 (m, 2H, Ar-1,10-H), 8.80–8.78 (m, 2H, Ar-4,7-H), 8.24–8.21 (m, 1H, Ar-6-H), 7.89 (s, 2H, <math>NH_2</math>), 7.73–7.69 (m, 2H, Ar-2,5-H), 7.68–7.64 (m, 2H, Ar-3,8-H), 6.93 (s, 1H, C = CH), 3.60–3.20 (m, 2H, N3-CH<math>_2</math>), 2.45–2.15 (m, 10H, Pip, Pip-CH<math>_2</math>), 2.09 (s, 3H, CH<math>_3</math>), 1.75 (m, 2H, N-CH<math>_2</math>-CH<math>_2</math>).</p> | [21] |
| 9  | <p>(Z)-5-(4-Phenoxybenzylidene)-2-amino-3-(3-(4-methylpiperazin-1-yl)propyl)-3H-imidazol-4(5H)-one hydrochloride</p>  <p><math>C_{24}H_{30}ClN_5O_2</math> MW 455.98.<br/> LC/MS±: purity &gt;99% <math>t_R</math> = 4.1, (ESI) <math>m/z</math> <math>[M+H]^+</math> 420.28.<br/> <math>^1H</math>-NMR (DMSO-<math>d_6</math>) <math>\delta</math> [ppm]: 7.62–7.57 (m, 3H, <math>NH_2</math>, Ph'-4-H), 7.46–7.36 (m, 4H, Ph-2,6-H, Ph'-3,5-H), 7.15–6.95 (m, 4H, Ph-3,5-H, Ph'-2,6-H), 6.72 (s, 1H, C = CH), 3.77 (br. s, 2H, N3-CH<math>_2</math>), 3.70–3.14 (m, 10H, Pip, Pip-CH<math>_2</math>), 2.79 (s, 3H, CH<math>_3</math>), 1.99 (br. s, 2H, N-CH<math>_2</math>-CH<math>_2</math>).</p>                                                | [21] |
| 10 | <p>(Z)-2-Amino-5-(anthracen-10-ylmethylene)-3-(3-(4-methylpiperazin-1-yl)propyl)-3H-imidazol-4(5H)-one hydrochloride</p>                                                                                                                                                                                                                                                                                                                                                                                                                                                                                                                                                                                                                                                                                                                 | [21] |

|    |                                                                                                                                                                                                                                                                                                                                                                                                                                                                                                                                                                                                                                                                                                                                                                                                                                                                                                                                                                                                                                                                                                              |                                                                 |
|----|--------------------------------------------------------------------------------------------------------------------------------------------------------------------------------------------------------------------------------------------------------------------------------------------------------------------------------------------------------------------------------------------------------------------------------------------------------------------------------------------------------------------------------------------------------------------------------------------------------------------------------------------------------------------------------------------------------------------------------------------------------------------------------------------------------------------------------------------------------------------------------------------------------------------------------------------------------------------------------------------------------------------------------------------------------------------------------------------------------------|-----------------------------------------------------------------|
|    | 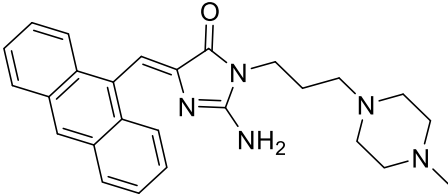 <p> <math>C_{26}H_{30}ClN_5O</math> MW 464.00.<br/>           LC/MS<math>\pm</math>: purity &gt;99% <math>t_R</math> = 3.89, (ESI) <math>m/z</math> <math>[M+H]^+</math> 428.26.<br/> <math>^1H</math>-NMR (DMSO-<math>d_6</math>) <math>\delta</math> [ppm]: 8.61 (br. s, 1H, Ar-5-H), 8.11–8.01 (m, 6H, Ar-1,4,6,9-H, NH<sub>2</sub>), 7.53–7.52 (m, 4H, Ar-2,3,7,8-H), 7.00 (s, 1H, C = CH), 3.40–3.15 (m, 2H, N<sub>3</sub>-CH<sub>2</sub>), 2.56–2.06 (m, 13H, Pip, Pip-CH<sub>2</sub>, CH<sub>3</sub>), 1.58–1.52 (m, 2H, N-CH<sub>2</sub>-CH<sub>2</sub>).         </p>                                                                                                                                                                                                                                                                                                                                                                                                                                             |                                                                 |
| 11 | <p>           Methyl 2-(1'-((4-(4-nitrophenyl)piperazin-1-yl)butyl)-2',4'-dioxospiro[fluorene-9,5'-imidazolidin]-3'-yl)acetate         </p>  <p>           hydrochloride<br/> <math>C_{32}H_{33}N_5O_6</math> MW 583.63. LC/MS<math>\pm</math>: purity 95.93%, <math>t_R</math> = 5.31, (ESI) <math>m/z</math> <math>[M+H]^+</math> 584.44<br/> <math>R_f</math> = 0.65 (toluene-acetone-MeOH 15:5:1); mp = 193°C<br/> <math>^1H</math> NMR (DMSO-<math>d_6</math>) <math>\delta</math> [ppm]: 0.92–1.08 (m, 2H, Pp-CH<sub>2</sub>-CH<sub>2</sub>), 1.19–1.25 (t def., 2H, Pp-CH<sub>2</sub>), 2.90–2.98 (t def., 4H, Pp-2,6-H), 3.20–3.26 (m, 2H, N<sub>1</sub>-CH<sub>2</sub>CH<sub>2</sub>), 3.40–3.48 (m, 2H, N<sub>1</sub>-CH<sub>2</sub>), 3.73 (s, 3H, OCH<sub>3</sub>), 4.19–4.28 (br. s, 2H, N<sub>3</sub>-CH<sub>2</sub>), 4.40–4.46 (m, 4H, Pp-3,5-H), 7.07–7.39 (m, 4H, Pp-Ar-2,6-H, Flu-1,8-H), 7.42–7.55 (m, 4H, Flu-2,3,6,7-H), 7.95–7.97 (m, 2H, Flu-4,5-H), 8.07–8.10 (m, 2H, Pp-Ar-3,5-H).         </p> | Compound synthesized based on methods described previously [32] |
| 12 | <p>           3'-Methyl-1'-(4-(4-(4-nitrophenyl)piperazin-1-yl)butyl)spiro[fluorene-9,5'-imidazolidine]-2',4'-dione         </p>                                                                                                                                                                                                                                                                                                                                                                                                                                                                                                                                                                                                                                                                                                                                                                                                                                                                                          | [33]                                                            |

|    |                                                                                                                                                                                                                                                                                                                                                                                                                                                                                                                                                                                                                                                                                                                                                                                                                                                                                                                    |      |
|----|--------------------------------------------------------------------------------------------------------------------------------------------------------------------------------------------------------------------------------------------------------------------------------------------------------------------------------------------------------------------------------------------------------------------------------------------------------------------------------------------------------------------------------------------------------------------------------------------------------------------------------------------------------------------------------------------------------------------------------------------------------------------------------------------------------------------------------------------------------------------------------------------------------------------|------|
|    | <p><math>C_{30}H_{31}N_5O_4</math> MW 525.24.<br/> LC/MS±: purity&gt;95% <math>t_R</math> = 5.01, (ESI) <math>m/z</math> <math>[M+H]^+</math> 526.39.<br/> <math>^1H</math> NMR (DMSO-<math>d_6</math>) <math>\delta</math> [ppm]: 0.96–1.01 (q, <math>J</math> = 7.2 Hz, 2H, Pp-CH<sub>2</sub>-CH<sub>2</sub>), 1.17–1.22 (q, <math>J</math> = 7.2 Hz, 2H, N1-CH<sub>2</sub>-CH<sub>2</sub>), 1.93–1.98 (t, <math>J</math> = 6.9 Hz, 2H, Pp-CH<sub>2</sub>), 2.23–2.26 (t def, 4H, Pp-2,6-H), 2.88–2.93 (t, <math>J</math> = 7.2 Hz, 2H, N1-CH<sub>2</sub>), 3.03 (s, 3H, N-CH<sub>3</sub>), 3.26–3.31 (m, 4H, Pp-3,5-H), 6.96–6.99 (d def, 2H, Pp-Ar-2,6-H), 7.32–7.37 (t def, 2H, Ar-2,7-H), 7.47–7.52 (m, 4H, Ar-1,3,6,8-H), 7.89–7.92 (q def, 2H, Ar-4,5-H), 8.00–8.04 (d def, 2H, Pp-Ar-3,5-H).</p>                                                                                                          |      |
| 13 | <p>1'-(4-(4-Benzhydrylpiperazin-1-yl)butyl)-3'-methylspiro[fluorene-9,5'-imidazolidine]-2',4'-dione hydrochloride</p> 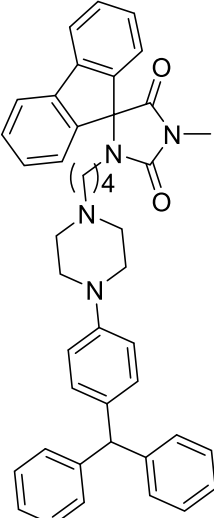 <p><math>C_{37}H_{39}ClN_4O_2</math> MW 607.18.<br/> LC/MS±: purity&gt;95% <math>t_R</math> = 6.16, (ESI) <math>m/z</math> <math>[M+H]^+</math> 570.74.<br/> <math>^1H</math>-NMR (DMSO-<math>d_6</math>) <math>\delta</math> [ppm]: 0.95 (br.s, 2H, N1-CH<sub>2</sub>-CH<sub>2</sub>), 1.47–1.48 (m, 2H, Pp-CH<sub>2</sub>-CH<sub>2</sub>), 2.74 (br.s, 2H, Pp-CH<sub>2</sub>), 2.87 (t, <math>J</math> = 6.8 Hz, 2H, N1-CH<sub>2</sub>), 3.03 (s, 3H, N3-CH<sub>3</sub>), 3.39 (br.s, 4H, Pp-2,6-H), 3.67 (br.s, 4H, Pp-3,5-H), 7.28–7.39 (m, 12H, Ar-2,7-H, 2x PpAR-2,3,4,5,6-H), 7.47–7.53 (t def, 4H, Ar-1,3,6,8-H), 7.68 (br.s, 2H, (Ph)<sub>2</sub>-CH, NH+), 7.90–7.93 (d def, 2H, Ar-4,5-H).</p> | [33] |
| 14 | <p>3'-Methyl-1'-(3-(4-(4-nitrophenyl)piperazin-1-yl)propyl)spiro[fluorene-9,5'-imidazolidine]-2',4'-dione</p>                                                                                                                                                                                                                                                                                                                                                                                                                                                                                                                                                                                                                                                                                                                                                                                                      | [33] |

|    |                                                                                                                                                                                                                                                                                                                                                                                                                                                                                                                                                                                                                                                                                                                                                                                                                                                                                                                                     |      |
|----|-------------------------------------------------------------------------------------------------------------------------------------------------------------------------------------------------------------------------------------------------------------------------------------------------------------------------------------------------------------------------------------------------------------------------------------------------------------------------------------------------------------------------------------------------------------------------------------------------------------------------------------------------------------------------------------------------------------------------------------------------------------------------------------------------------------------------------------------------------------------------------------------------------------------------------------|------|
|    | 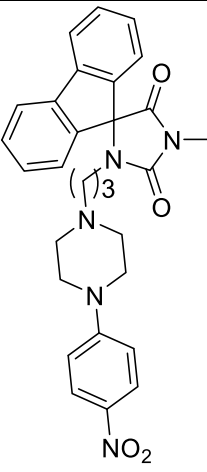 <p> <math>C_{29}H_{29}N_5O_4</math> MW 511.57.<br/> LC/MS<math>\pm</math>: purity &gt;95% <math>t_R</math> = 4.92, (ESI) <math>m/z</math> <math>[M+H]^+</math> 512.41.<br/> <math>^1H</math> NMR (DMSO-<math>d_6</math>) <math>\delta</math> [ppm]: 1.23–1.28 (qu def, 2H, Pp-CH<sub>2</sub>-CH<sub>2</sub>), 2.01–2.08 (qu def, 6H, Pp-CH<sub>2</sub>, Pp-2,6-H), 2.88–2.93 (t def, 2H, N1-CH<sub>2</sub>), 3.04 (s, 3H, N3-CH<sub>3</sub>), 3.19 (br.s, 4H, Pp-3,5-H), 6.93–6.96 (d def, 2H, PpAr-2,6-H), 7.33–7.39 (t def, 2H, Ar-2,7-H), 7.49–7.55 (t def, 4H, Ar-1,3,6,8-H), 7.92–7.95 (d def, 2H, Ar-4,5-H), 7.99–8.03 (d def, 2H, PpAr-3,5-H). </p>                                                                                                                                                                                        |      |
| 15 | <p> 3'-Methyl-1'-(5-(4-(4-nitrophenyl)piperazin-1-yl)pentyl)spiro<br/> [fluorene-9,5'-imidazolidine]-2',4'-dione </p>  <p> <math>C_{31}H_{33}N_5O_4</math> MW 539.62.<br/> LC/MS<math>\pm</math>: purity &gt;95% <math>t_R</math> = 5.21, (ESI) <math>m/z</math> <math>[M+H]^+</math> 540.26.<br/> <math>^1H</math> NMR (DMSO-<math>d_6</math>) <math>\delta</math> [ppm]: 0.96–1.08 (m, 6H, N1-CH<sub>2</sub>-CH<sub>2</sub>-CH<sub>2</sub>-CH<sub>2</sub>-CH<sub>2</sub>), 2.01–2.09 (t def, 2H, Pp-CH<sub>2</sub>), 2.29–2.33 (t def, 4H, Pp-2,6-H), 2.85–2.89 (t def, 2H, N1-CH<sub>2</sub>), 3.03 (s, 3H, N3-CH<sub>3</sub>), 3.28–3.37 (br.s, 4H, Pp-3,5-H), 6.95–7.00 (d def, 2H, PpAr-2,6-H), 7.32–7.37 (t def, 2H, Ar-2,7-H), 7.46–7.53 (m, 4H, Ar-1,3,6,8-H), 7.89–7.93 (d def, 2H, Ar-4,5-H), 8.00–8.05 (d def, 2H, PpAr-3,5-H). </p> | [33] |
| 16 | <p> (Z)-5-(4-chlorobenzylidene)-3-phenyl-2-thioxoimidazolidin-4-one </p>                                                                                                                                                                                                                                                                                                                                                                                                                                                                                                                                                                                                                                                                                                                                                                                                                                                            | [35] |

|    |                                                                                                                                                                                                                                                                                                                                                                                                                                                                                                                                                                                                                                                                                                               |      |
|----|---------------------------------------------------------------------------------------------------------------------------------------------------------------------------------------------------------------------------------------------------------------------------------------------------------------------------------------------------------------------------------------------------------------------------------------------------------------------------------------------------------------------------------------------------------------------------------------------------------------------------------------------------------------------------------------------------------------|------|
|    | 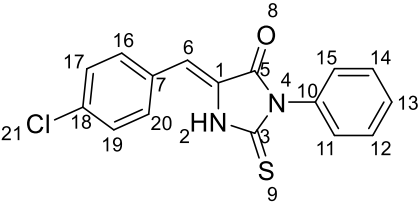 <p><math>C_{16}H_{11}ClN_2OS</math>, MW 314.79.<br/> LC/MS<math>\pm</math>: purity &gt; 99%; tR = 9.22; (ESI) m/z [M+H]<math>^+</math> 315.259.<br/> <math>^1H</math> NMR (DMSO-<math>d_6</math>) <math>\delta</math> [ppm]: 12.66 (s, 1H, NH), 7.84 (d, 2H, J = 8.7 Hz, Ar-16,20-H), 7.54 – 7.43 (m, 5H, Ar-11,12,13,14,15-H), 7.39 (dd, 2H, J = 8.2, 1.1 Hz, Ar-17,19-H), 6.68 (s, 1H, C = CH).</p>                                                                                                                                                                                                                       |      |
| 17 | <p>(Z)-5-(4-chlorobenzylidene)-3-phenyl-2-selenoxoimidazolidin-4-one</p>  <p><math>C_{16}H_{11}ClN_2OSe</math>, MW 361.70.<br/> LC/MS<math>\pm</math>: purity &gt;99%; tR = 9.22; (ESI) m/z [M+H]<math>^+</math> 362.887.<br/> <math>^1H</math> NMR (DMSO-<math>d_6</math>) <math>\delta</math> [ppm]: 13.18 (s, 1H, NH), 7.90 (d, 2H, J = 8.5 Hz, Ar- 16,20-H), 7.57 – 7.50 (m,5H, Ar- 11,12,13,14,15-H), 7.41 – 7.38 (m, 2H, Ar-17,19-H).</p>                                                                                                                                                                              | [35] |
| 18 | <p>(Z)-5-((E)-3-phenylallylidene)-2-selenoxo-3-(p-tolyl)thiazolidin-4-one</p>  <p><math>C_{19}H_{15}NOSSe</math>, MW 384.37.<br/> LC/MS<math>\pm</math>: purity 95%; tR = 9.99; (ESI) m/z [M+H]<math>^+</math> 385.836<br/> <math>^1H</math> NMR (DMSO-<math>d_6</math>) <math>\delta</math> [ppm]: <math>\delta</math> 7.74 (m, 2H, Ar-18,22-H), 7.64 (d, 1H,J = 11.6 Hz, C = CH16), 7.49 (d, 1H, J = 15.1 Hz, C=CH6), 7.45 – 7.41 (m, 3H, Ar-19,20,21-H), 7.35 (d, 2H, J = 8.0 Hz, Ar- 11,15-H), 7.27 (d, 2H, J = 8.2 Hz, , Ar-12,14-H), 7.19 (dd, 1H, J = 15.1, 11.6 Hz, C=CH7), 2.37 (s, 3H, -CH<math>_3</math>).</p> | [36] |
| 19 | <p>(Z)-5-((E)-3-phenylallylidene)-2-thioxo-3-(p-tolyl)thiazolidin-4-one</p>  <p><math>C_{19}H_{15}NOS_2</math>, MW 337.46.<br/> LC/MS<math>\pm</math>: purity &gt;99%; tR = 3.34; (ESI) m/z [M+H]<math>^+</math> 338.275.</p>                                                                                                                                                                                                                                                                                                                                                                                              | [36] |

|    |                                                                                                                                                                                                                                                                                                                                                                                                                                                                                                                                                                                                                                                                                                                                                                                                                                                       |                                                              |
|----|-------------------------------------------------------------------------------------------------------------------------------------------------------------------------------------------------------------------------------------------------------------------------------------------------------------------------------------------------------------------------------------------------------------------------------------------------------------------------------------------------------------------------------------------------------------------------------------------------------------------------------------------------------------------------------------------------------------------------------------------------------------------------------------------------------------------------------------------------------|--------------------------------------------------------------|
|    | <sup>1</sup> H NMR (DMSO-d <sub>6</sub> ) δ [ppm]: δ 7.73 (d, 2H, J = 6.5 Hz, Ar-18,22-H), 7.56 (d, 1H, J = 11.5 Hz, C = CH16), 7.46 – 7.40 (m, 4H, Ar-19,20,21-H, C=CH6), 7.34 (d, 2H, J = 8.3 Hz, Ar-11,15-H), 7.25 (d, 2H, J = 8.3 Hz, Ar-12,14-H), 7.17 (dd, 1H, J = 15.2, 11.6 Hz, C=CH7), 2.37 (s, 3H, -CH <sub>3</sub> ).                                                                                                                                                                                                                                                                                                                                                                                                                                                                                                                      |                                                              |
| 20 | <p>(Z)-5-benzylidene-3-phenyl-2-selenoxothiazolidin-4-one</p> 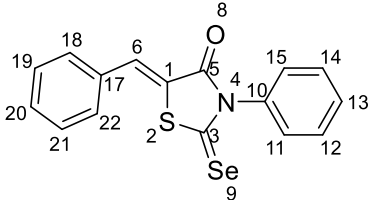 <p>C<sub>16</sub>H<sub>11</sub>NOSSe, MW 344.30.<br/>           Elemental analysis %(calculated/found):<br/>           C 55.8/56.4, H 3.2/3.1, N 4.1/3.9. Purity &gt;95%<br/> <sup>1</sup>H NMR in CDCl<sub>3</sub> δ [ppm]: δ 7.13-7.73 (m, 10H, Ar), 7.90 (s, 1H, C=CH)</p>                                                                                                                                                                                                                                                                                                                                                                                                                         | [36]                                                         |
| 21 | <p>(Z)-5-benzylidene-3-(4-bromophenyl)-2-thioxothiazolidin-4-one</p>  <p>C<sub>16</sub>H<sub>10</sub>BrNOS<sub>2</sub>, MW 376.29.<br/>           LC/MS±: purity &gt; 99%; t<sub>R</sub> = 9.95; (ESI) m/z [M+H]<sup>+</sup> 377.987.<br/>           HRMS purity &gt; 99%; t<sub>R</sub> = 9.41 [ESI<sup>+</sup>]: [M+H]<sup>+</sup> found: 377.854.<br/> <sup>1</sup>H NMR (DMSO-d<sub>6</sub>) δ [ppm]: δ 7.86 (s, 1H, C = CH), 7.78 (d, 2H, J = 8.8 Hz, Ar-11,15-H), 7.69 (d, 2H, J = 7.4 Hz, Ar-18,22-H), 7.61 – 7.52 (m, 3H, Ar-19,20,21-H), 7.42 (d, 2H, J = 8.8 Hz, Ar-12,14-H).<br/> <sup>13</sup>C NMR (DMSO-d<sub>6</sub>) δ [ppm]: NMR (126 MHz, ) δ 194.44, 167.30, 135.03, 133.55, 133.31, 132.95, 131.60, 131.54, 131.16, 130.14, 123.83, 123.42.</p> | Compound synthesized using methods described previously [36] |

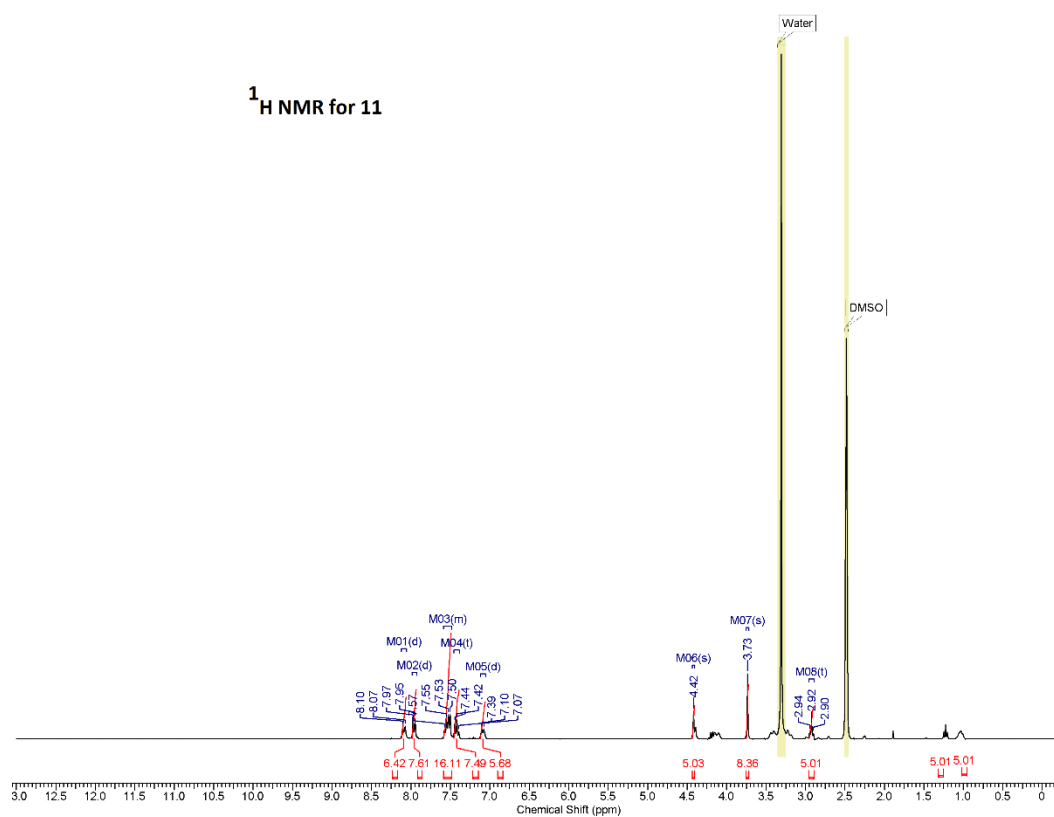

**Figure S1.** <sup>1</sup>H NMR for 11.

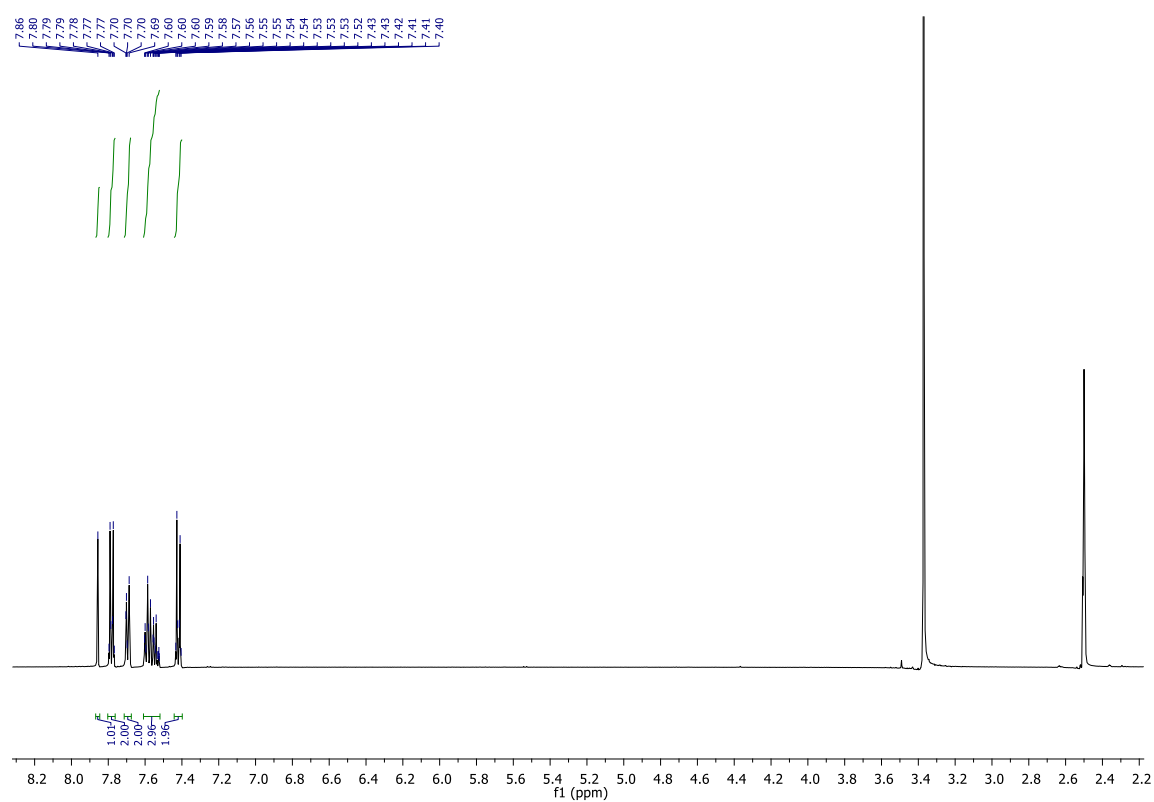

**Figure S2.** <sup>1</sup>H-NMR for 21.

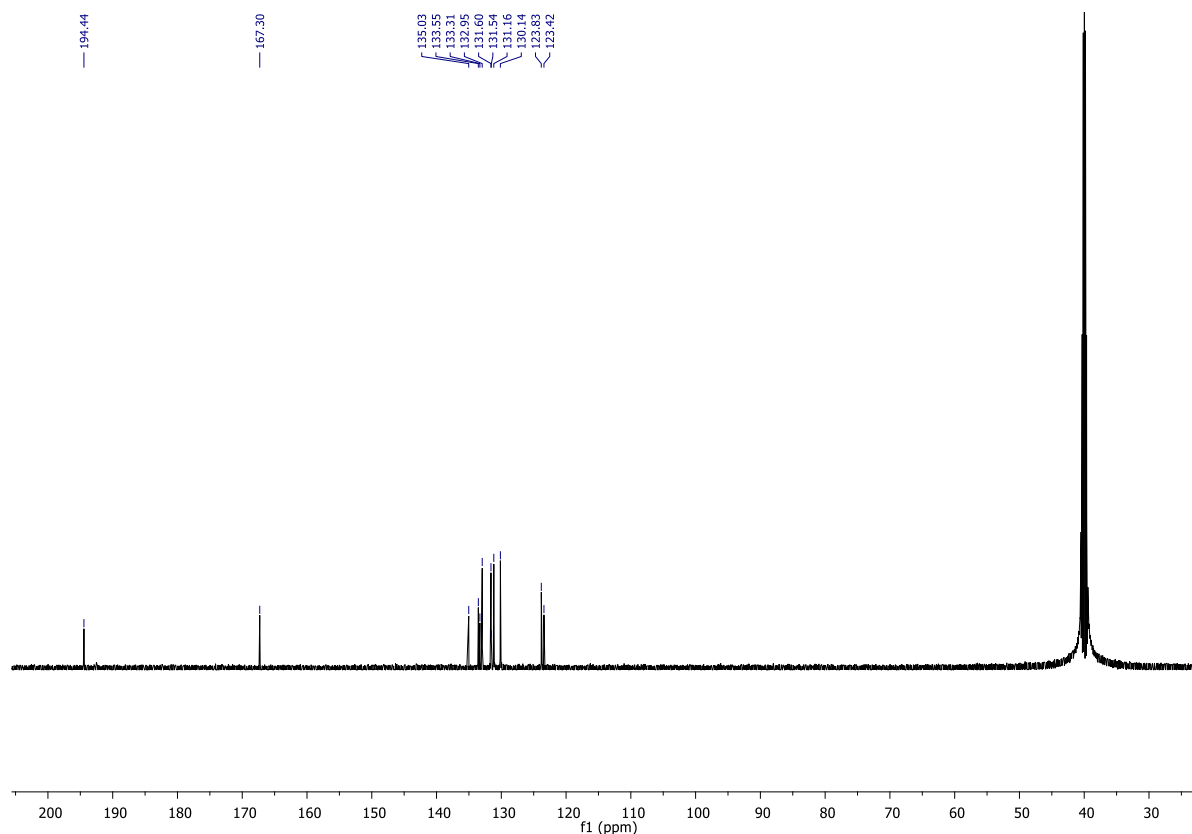

**Figure S3.**  $^{13}\text{C}$  NMR for **21**.

[21] Kaczor, A.; Witek, K.; Podlewska, S.; Czekajewska, J.; Lubelska, A.; Żesławska, E.; Nitek, W.; Latacz, G.; Alibert, S.; Pagès, J.M.; et al. 5-Arylideneimidazolones with Amine at Position 3 as Potential Antibiotic Adjuvants against Multidrug Resistant Bacteria. *Molecules* **2019**, *24*, doi:10.3390/molecules24030438

[32] Żesławska, E.; Kincses, A.; Spengler, G.; Nitek, W.; Wyrzuc, K.; Kieć-Kononowicz, K.; Handzlik, J. The 5-Aromatic Hydantoin-3-Acetate Derivatives as Inhibitors of the Tumour Multidrug Resistance Efflux Pump P-Glycoprotein (ABCB1): Synthesis, Crystallographic and Biological Studies. *Bioorg Med Chem* **2016**, *24*, 2815–2822, doi:10.1016/j.bmc.2016.04.055.

[33] Żesławska, E.; Kucwaj-Brysz, K.; Kincses, A.; Spengler, G.; Szymańska, E.; Czopek, A.; Marć, M.A.; Kaczor, A.; Nitek, W.; Domínguez-Álvarez, E.; et al. An Insight into the Structure of 5-Spiro Aromatic Derivatives of Imidazolidine-2,4-Dione, a New Group of Very Potent Inhibitors of Tumor Multidrug Resistance in T-Lymphoma Cells. *Bioorg Chem* **2021**, *109*, doi:10.1016/j.bioorg.2021.104735.

[35] Korohoda, M. Introduction of Selenium into Heterocyclic compounds. 1. Synthesis of 3-Aryl-2-Selenohydantoins with Double-Bond at C-5. *Pol J Chem* **1980**, *54*, 683–692.

[36] Tejchman, W.; Korohoda, M.J. Introduction of Selenium to Heterocyclic Compounds. Part VI. Synthesis of 3-Aryl-5-Benzylidene- and 3-Aryl-5-Cinnamylidene-2-Selenorhodanines. *Polish J. Chem.* **1996**, *70*, 1124–1134.

## Microbiological assays

**Table S2.** Characteristics of *S. aureus* clinical isolates enrolled in the studies.

| <i>Staphylococcus aureus</i> strain | Relevant phenotype*                 |
|-------------------------------------|-------------------------------------|
| MM-O058                             | Clinical isolate, CC121, MSSA, MDR  |
| MM-N072                             | Clinical isolate, CC152, MSSA, MDR  |
| LG-N017                             | Clinical isolate, CC5, MRSA, MDR    |
| MM-O021                             | Clinical isolate, CC8, MRSA, MDR    |
| R45-CC45                            | Clinical isolate, CC45, MRSA        |
| R46-CC22                            | Clinical isolate, CC22, MRSA        |
| USA300 LAC                          | Clinical isolate, CC8, CA-MRSA, MDR |
| 5328                                | Clinical isolate, CC398, LA-MRSA    |
| COL                                 | Clinical isolate, MRSA              |
| Mu50                                | Clinical isolate, CC5, MRSA, VISA   |

\*CC, clonal complex; MSSA, methicillin-susceptible *S. aureus*; MRSA, methicillin-resistant *S. aureus*; CA-MRSA, community-acquired MRSA; LA-MRSA, livestock-associated MRSA; VISA, vancomycin-intermediate *S. aureus*; MDR, multidrug-resistant.

**Table S3.** Susceptibility of *S. aureus* clinical isolates to antibacterial agents employed in the studies.

| Strain     | MIC of antibiotics [ $\mu\text{g/ml}$ ] |              |                     |               |            |
|------------|-----------------------------------------|--------------|---------------------|---------------|------------|
|            | OXA                                     | AMP          | ERY                 | CIP           | VAN        |
| MM-O058    | 0.25 (0.0006)                           | 8 (0.0229)   | > 256 (0.3488)      | 0.25 (0.0006) | ND         |
| MM-N072    | 0.25 (0.0006)                           | 32 (0.0916)  | $\geq$ 256 (0.3488) | 0.25 (0.0006) | ND         |
| LG-N017    | 12 (0.0283)                             | 16 (0.0458)  | 8 (0.0109)          | 0.5 (0.0013)  | ND         |
| MM-O021    | 48 (0.1134)                             | 128 (0.3663) | > 256 (0.3488)      | 0.25 (0.0006) | ND         |
| R45-CC45   | 4 (0.0094)                              | 48 (0.1374)  | 1 (0.0014)          | 0.25 (0.0006) | ND         |
| R46-CC22   | 64 (0.1512)                             | 32 (0.0916)  | 0.5 (0.0007)        | 64 (0.1659)   | ND         |
| USA300 LAC | 12 (0.0283)                             | 64 (0.1832)  | 64 (0.0872)         | 8 (0.0207)    | ND         |
| 5328       | 4 (0.0094)                              | 64 (0.1832)  | > 256 (0.3488)      | 0.25 (0.0006) | ND         |
| COL        | 128 (0.3023)                            | 8 (0.0229)   | 0.25 (0.0003)       | 0.25 (0.0006) | ND         |
| Mu50       | 256 (0.6046)                            | 32 (0.0916)  | > 256 (0.3488)      | 32 (0.0829)   | 8 (0.0055) |

OXA, oxacillin; AMP, ampicillin; ERY, erythromycin; CIP, ciprofloxacin; VAN, vancomycin. Values in brackets represent MIC values in mM. ND – not determined.

**Table S4.** Intrinsic antibacterial activities of compounds **7-21** against *S. aureus* clinical isolates.

| Compound  | MIC of compound [mM]* |         |          |          |          |          |            |         |         |          |
|-----------|-----------------------|---------|----------|----------|----------|----------|------------|---------|---------|----------|
|           | MM-O058               | MM-N072 | LG-N017  | MM-O021  | R45-CC45 | R46-CC22 | USA300 LAC | 5328    | COL     | MU50     |
| <b>7</b>  | > 1                   | > 1     | > 1      | > 1      | > 1      | > 1      | > 1        | > 1     | > 1     | > 1      |
| <b>8</b>  | 0.25                  | 0.25    | 0.25-0.5 | 0.25-0.5 | 0.25     | 0.25     | 0.25       | 0.25    | 0.5     | 0.25-0.5 |
| <b>9</b>  | 0.5                   | 0.5-1   | 1        | > 1      | 1        | 1        | 1          | 1       | > 0.5   | 0.5      |
| <b>10</b> | 0.5                   | 0.5     | 1        | 1        | 0.5      | 0.5      | 0.25       | 0.5     | 1       | 0.5      |
| <b>11</b> | ≥ 0.5                 | ≥ 0.5   | ≥ 0.5    | ≥ 0.5    | ≥ 0.5    | ≥ 0.5    | ≥ 0.5      | ≥ 0.5   | ≥ 0.5   | ≥ 0.5    |
| <b>12</b> | 0.25-0.5              | 0.25    | 0.5      | 0.5      | 0.5      | 1        | 1          | 0.5     | 0.5     | 0.5      |
| <b>13</b> | 0.25                  | 0.25    | 0.25     | 0.25     | 0.25     | 0.25     | 0.25       | 0.25    | 0.25    | 0.25     |
| <b>14</b> | 0.25                  | 0.25    | 0.25     | 0.25     | 0.25     | 0.25     | 0.25       | 0.25    | 0.25    | 0.25     |
| <b>15</b> | 0.5                   | 0.5     | 0.5      | 0.5      | 0.5      | 0.5      | 0.5        | 0.5     | 0.5     | 0.25     |
| <b>16</b> | > 0.25                | > 0.25  | > 0.25   | > 0.25   | 0.25     | > 0.25   | > 0.25     | > 0.25  | > 0.25  | 0.25     |
| <b>17</b> | > 0.25                | > 0.25  | > 0.25   | > 0.25   | > 0.25   | > 0.25   | > 0.25     | > 0.25  | > 0.25  | > 0.25   |
| <b>18</b> | > 0.125               | > 0.125 | > 0.125  | > 0.125  | > 0.125  | > 0.125  | > 0.125    | > 0.125 | > 0.125 | > 0.125  |
| <b>19</b> | > 0.25                | > 0.25  | > 0.25   | > 0.25   | > 0.25   | > 0.25   | > 0.25     | > 0.25  | > 0.25  | > 0.25   |
| <b>20</b> | > 0.125               | > 0.125 | > 0.125  | > 0.125  | 0.0625   | > 0.125  | > 0.125    | > 0.125 | > 0.125 | > 0.125  |
| <b>21</b> | 0.25                  | 0.25    | 0.25     | 0.25     | > 0.25   | > 0.25   | > 0.25     | > 0.25  | 0.25    | > 0.25   |

\*Assessment of the exact MICs of the compounds 7, 11, 16-23 was not always possible due to their precipitation in bacterial suspension.

**Table S5.** Effect of compound 7 MICs of oxacillin (OXA) and ampicillin (AMP) against selected *S. aureus* clinical isolates.

| Strain      | Concentration of compound [mM] | OXA                                  |                   | AMP                                  |                   |
|-------------|--------------------------------|--------------------------------------|-------------------|--------------------------------------|-------------------|
|             |                                | Numerical value of reduction [µg/ml] | Activity gain [A] | Numerical value of reduction [µg/ml] | Activity gain [A] |
| MM-O058     | 0.25                           | -                                    | no effect         | -                                    | no effect         |
|             | 0.5                            | -                                    | no effect         | from 8 to 4                          | 2                 |
| MM-N072     | 0.25                           | -                                    | no effect         | from 32 to 16                        | 2                 |
|             | 0.5                            | from 0.25 to 0.125                   | 2                 | from 32 to 16                        | 2                 |
| LG-N017*    | 0.25                           | <b>from 12 to 2</b>                  | 6                 | from 16 to 4                         | 4                 |
|             | 0.5                            | <b>from 12 to 0.25</b>               | 48                | from 16 to 1.5                       | 10.7              |
| MM-O021*    | 0.25                           | from 48 to 8                         | 6                 | from 128 to 64                       | 2                 |
|             | 0.5                            | <b>from 48 to 1.5</b>                | 32                | from 128 to 32                       | 4                 |
| R45-CC45*   | 0.25                           | <b>from 4 to 1</b>                   | 4                 | from 48 to 8                         | 6                 |
|             | 0.5                            | <b>from 4 to 0.25</b>                | 16                | from 48 to 2                         | 24                |
| R46-CC22*   | 0.25                           | from 64 to 32                        | 2                 | from 32 to 16                        | 2                 |
|             | 0.5                            | from 64 to 8                         | 8                 | from 32 to 8                         | 4                 |
| USA300 LAC* | 0.25                           | <b>from 12 to 1.5</b>                | 8                 | -                                    | no effect         |
|             | 0.5                            | <b>from 12 to 0.5</b>                | 24                | from 64 to 16                        | 4                 |
| 5328*       | 0.25                           | <b>from 4 to 1</b>                   | 4                 | from 64 to 32                        | 2                 |
|             | 0.5                            | <b>from 4 to 0.25</b>                | 16                | from 64 to 16                        | 4                 |
| COL*        | 0.25                           | from 128 to 32                       | 4                 | -                                    | no effect         |
|             | 0.5                            | <b>from 128 to 2</b>                 | 64                | from 8 to 2                          | 4                 |
| Mu50*       | 0.25                           | from 256 to 32                       | 8                 | -                                    | no effect         |
|             | 0.5                            | from 256 to 4                        | 64                | from 32 to 4                         | 8                 |

\*MRSA strain; values in bold correspond to a restoration of OXA activity against MRSA.

**Table S6.** Effect of compound 8 on MICs of OXA and AMP against selected *S. aureus* clinical isolates.

| Strain      | Concentration of compound [mM] | OXA                                  |                   | AMP                                  |                   |
|-------------|--------------------------------|--------------------------------------|-------------------|--------------------------------------|-------------------|
|             |                                | Numerical value of reduction [µg/ml] | Activity gain [A] | Numerical value of reduction [µg/ml] | Activity gain [A] |
| MM-O058     | 0.0625                         | -                                    | no effect         | from 8 to 6                          | 1.3               |
| MM-N072     | 0.0625                         | from 0.25 to 0.125                   | 2                 | from 32 to 16                        | 2                 |
| LG-N017*    | 0.0625                         | from 12 to 4                         | 3                 | -                                    | no effect         |
|             | 0.125                          | <b>from 12 to 2</b>                  | 6                 | from 16 to 12                        | 1.3               |
| MM-O021*    | 0.0625                         | from 48 to 16                        | 3                 | -                                    | no effect         |
|             | 0.125                          | <b>from 48 to 0.25</b>               | 192               | from 128 to 8                        | 16                |
| R45-CC45*   | 0.0625                         | <b>from 4 to 1.5</b>                 | 2.7               | from 48 to 16                        | 3                 |
| R46-CC22*   | 0.0625                         | from 64 to 32                        | 2                 | from 32 to 24                        | 1.3               |
| USA300 LAC* | 0.0625                         | <b>from 12 to 1.5</b>                | 8                 | -                                    | no effect         |
|             | 0.0625                         | <b>from 4 to 0.75</b>                | 5.3               | from 64 to 32                        | 2                 |
| COL*        | 0.0625                         | from 128 to 32                       | 4                 | -                                    | no effect         |
|             | 0.125                          | <b>from 128 to 2</b>                 | 64                | from 8 to 4                          | 2                 |
| Mu50*       | 0.0625                         | from 256 to 64                       | 4                 | -                                    | no effect         |
|             | 0.125                          | from 256 to 32                       | 8                 | from 32 to 16                        | -                 |

\*MRSA strain; values in bold correspond to a restoration of OXA activity against MRSA.

**Table S7.** Effect of compound **9** on MICs of OXA and AMP against selected *S. aureus* clinical isolates.

| Strain      | OXA                            |                                      |                   | AMP                                  |                   |
|-------------|--------------------------------|--------------------------------------|-------------------|--------------------------------------|-------------------|
|             | Concentration of compound [mM] | Numerical value of reduction [µg/ml] | Activity gain [A] | Numerical value of reduction [µg/ml] | Activity gain [A] |
| MM-O058     | 0.125                          | -                                    | no effect         | -                                    | no effect         |
| MM-N072     | 0.25                           | -                                    | no effect         | from 32 to 16                        | 2                 |
| LG-N017*    | 0.125                          | <b>from 12 to 2</b>                  | 6                 | -                                    | no effect         |
|             | 0.25                           | <b>from 12 to 0.25</b>               | 24                | from 16 to 8                         | 2                 |
| MM-O021*    | 0.25                           | <b>from 48 to 2</b>                  | 24                | from 128 to 49                       | 2.5               |
|             | 0.5                            | <b>from 48 to 0.25</b>               | 192               | from 128 to 7                        | 18                |
| R45-CC45*   | 0.125                          | <b>from 4 to 1</b>                   | 4                 | from 48 to 16                        | 3                 |
|             | 0.25                           | <b>from 4 to 0.25</b>                | 16                | from 48 to 4                         | 12                |
| R46-CC22*   | 0.125                          | from 64 to 16                        | 4                 | -                                    | no effect         |
|             | 0.25                           | from 64 to 4                         | 16                | from 32 to 16                        | 2                 |
| USA300 LAC* | 0.125                          | <b>from 12 to 1.5</b>                | 8                 | -                                    | no effect         |
|             | 0.25                           | <b>from 12 to 0.25</b>               | 48                | -                                    | no effect         |
| 5328*       | 0.125                          | <b>from 4 to 2</b>                   | 2                 | from 64 to 48                        | 1.3               |
|             | 0.25                           | <b>from 4 to 0.5</b>                 | 8                 | from 64 to 32                        | 2                 |
| COL*        | 0.125                          | from 128 to 32                       | 4                 | -                                    | no effect         |
|             | 0.25                           | <b>from 128 to 2</b>                 | 64                | from 8 to 2                          | 4                 |
|             | 0.0625                         | from 256 to 32                       | 8                 | -                                    | no effect         |
| Mu50*       | 0.125                          | from 256 to 8                        | 32                | from 32 to 16                        | 2                 |

\*MRSA strain; values in bold correspond to a restoration of OXA activity against MRSA.

**Table S8.** Effect of compound **10** on MICs of OXA and AMP against selected *S. aureus* clinical isolates.

| Strain      | OXA                            |                                      |                   | AMP                                  |                   |
|-------------|--------------------------------|--------------------------------------|-------------------|--------------------------------------|-------------------|
|             | Concentration of compound [mM] | Numerical value of reduction [µg/ml] | Activity gain [A] | Numerical value of reduction [µg/ml] | Activity gain [A] |
| MM-O058     | 0.125                          | -                                    | no effect         | -                                    | no effect         |
| MM-N072     | 0.125                          | -                                    | no effect         | -                                    | no effect         |
| LG-N017*    | 0.125                          | from 12 to 4                         | 3                 | from 16 to 4                         | 4                 |
|             | 0.25                           | <b>from 12 to 1</b>                  | 12                | from 16 to 4                         | 4                 |
| MM-O021*    | 0.25                           | from 48 to 8                         | 8                 | from 128 to 32                       | 4                 |
| R45-CC45*   | 0.125                          | <b>from 4 to 2</b>                   | 2                 | from 48 to 16                        | 3                 |
| R46-CC22*   | 0.125                          | from 64 to 16                        | 4                 | from 32 to 16                        | 2                 |
| USA300 LAC* | 0.0625                         | -                                    | 8                 | -                                    | no effect         |
| 5328*       | 0.125                          | -                                    | no effect         | -                                    | no effect         |
| COL*        | 0.125                          | -                                    | no effect         | -                                    | no effect         |
|             | 0.25                           | -                                    | no effect         | -                                    | -                 |
| Mu50*       | 0.125                          | from 256 to 16                       | 16                | from 32 to 16                        | 2                 |

\*MRSA strain; values in bold correspond to a restoration of OXA activity against MRSA.

**Table S9.** Effect of compound **11** on MICs of OXA and AMP against selected *S. aureus* clinical isolates.

| Strain      | Concentration of compound [mM] | OXA                                  |                   | AMP                                  |                   |
|-------------|--------------------------------|--------------------------------------|-------------------|--------------------------------------|-------------------|
|             |                                | Numerical value of reduction [µg/ml] | Activity gain [A] | Numerical value of reduction [µg/ml] | Activity gain [A] |
| MM-O058     | 0.0625                         | -                                    | no effect         | -                                    | no effect         |
|             | 0.125                          | -                                    | no effect         | -                                    | no effect         |
| MM-N072     | 0.0625                         | -                                    | no effect         | -                                    | no effect         |
|             | 0.125                          | -                                    | no effect         | from 32 to 16                        | 2                 |
| LG-N017*    | 0.0625                         | from 12 to 4                         | 3                 | -                                    | no effect         |
|             | 0.125                          | from 12 to 4                         | 3                 | from 16 to 8                         | 2                 |
| MM-O021*    | 0.0625                         | from 48 to 6                         | 8                 | -                                    | no effect         |
|             | 0.125                          | from 48 to 4                         | 12                | -                                    | no effect         |
| R45-CC45*   | 0.0625                         | <b>from 4 to 2</b>                   | 2                 | from 48 to 32                        | 1.5               |
|             | 0.125                          | <b>from 4 to 0.5</b>                 | 8                 | from 48 to 16                        | 3                 |
| R46-CC22*   | 0.0625                         | -                                    | no effect         | from 32 to 16                        | 2                 |
|             | 0.125                          | from 64 to 32                        | 2                 | from 32 to 8                         | 4                 |
| USA300 LAC* | 0.0625                         | from 12 to 6                         | 2                 | -                                    | no effect         |
|             | 0.125                          | <b>from 12 to 1</b>                  | 12                | from 64 to 24                        | 2.7               |
| 5328*       | 0.0625                         | -                                    | no effect         | -                                    | no effect         |
|             | 0.125                          | -                                    | no effect         | -                                    | no effect         |
| COL*        | 0.0625                         | -                                    | no effect         | -                                    | no effect         |
|             | 0.125                          | -                                    | no effect         | -                                    | no effect         |
| Mu50*       | 0.0625                         | from 256 to 64                       | 4                 | -                                    | no effect         |
|             | 0.125                          | from 256 to 64                       | 4                 | -                                    | no effect         |

\*MRSA strain; values in bold correspond to a restoration of OXA activity against MRSA.

**Table S10.** Effect of compound **12** on MICs of OXA and AMP against selected *S. aureus* clinical isolates.

| Strain      | Concentration of compound [mM] | OXA                                  |                   | AMP                                  |                   |
|-------------|--------------------------------|--------------------------------------|-------------------|--------------------------------------|-------------------|
|             |                                | Numerical value of reduction [µg/ml] | Activity gain [A] | Numerical value of reduction [µg/ml] | Activity gain [A] |
| MM-O058     | 0.0625                         | -                                    | no effect         | -                                    | no effect         |
|             | 0.125                          | -                                    | no effect         | -                                    | no effect         |
| MM-N072     | 0.0625                         | -                                    | no effect         | -                                    | no effect         |
|             | 0.0625                         | -                                    | no effect         | from 16 to 12                        | 1.3               |
| LG-N017*    | 0.0625                         | -                                    | no effect         | from 16 to 12                        | 1.3               |
|             | 0.125                          | <b>from 12 to 0.75</b>               | 16                | from 16 to 12                        | 1.3               |
| MM-O021*    | 0.0625                         | from 48 to 24                        | 2                 | -                                    | no effect         |
|             | 0.125                          | <b>from 48 to 2</b>                  | 24                | -                                    | no effect         |
| R45-CC45*   | 0.125                          | <b>from 4 to 1</b>                   | 4                 | from 48 to 32                        | 1.5               |
|             | 0.25                           | <b>from 4 to 0.5</b>                 | 8                 | from 48 to 16                        | 3                 |
| R46-CC22*   | 0.125                          | -                                    | no effect         | from 32 to 16                        | 2                 |
|             | 0.25                           | from 64 to 32                        | 2                 | from 32 to 8                         | 4                 |
| USA300 LAC* | 0.125                          | <b>from 12 to 0.25</b>               | 48                | from 64 to 48                        | 1.3               |
|             | 0.125                          | -                                    | no effect         | -                                    | no effect         |
| 5328*       | 0.125                          | -                                    | no effect         | from 64 to 12                        | 5.3               |
|             | 0.25                           | -                                    | no effect         | -                                    | no effect         |
| COL*        | 0.0625                         | -                                    | no effect         | -                                    | no effect         |
|             | 0.125                          | -                                    | no effect         | -                                    | no effect         |

|              |        |                |   |   |           |
|--------------|--------|----------------|---|---|-----------|
| <b>Mu50*</b> | 0.0625 | from 256 to 32 | 8 | - | no effect |
|              | 0.125  | from 256 to 32 | 8 | - | no effect |

\*MRSA strain; values in bold correspond to a restoration of OXA activity against MRSA.

**Table S11.** Effect of compound **13** on MICs of OXA and AMP against *S. aureus* clinical isolates.

| OXA         |                                |                                      |                   | AMP                                  |                   |
|-------------|--------------------------------|--------------------------------------|-------------------|--------------------------------------|-------------------|
| Strain      | Concentration of compound [mM] | Numerical value of reduction [μg/ml] | Activity gain [A] | Numerical value of reduction [μg/ml] | Activity gain [A] |
| MM-O058     | 0.0625                         | from 0.25 to 0.125                   | 2                 | from 8 to 4                          | 2                 |
| MM-N072     | 0.0625                         | from 0.25 to 0.125                   | 2                 | from 32 to 16                        | 2                 |
| LG-N017*    | 0.0625                         | <b>from 12 to 0.25</b>               | 48                | from 16 to 4                         | 4                 |
| MM-O021*    | 0.0625                         | <b>from 48 to 1.5</b>                | 32                | from 128 to 64                       | 2                 |
| R45-CC45*   | 0.0625                         | <b>from 4 to 0.125</b>               | 32                | from 48 to 8                         | 6                 |
| R46-CC22*   | 0.0625                         | <b>from 64 to 2</b>                  | 32                | from 32 to 8                         | 4                 |
| USA300 LAC* | 0.0625                         | <b>from 12 to 0.25</b>               | 48                | from 64 to 32                        | 2                 |
| 5328*       | 0.0625                         | <b>from 4 to 0.125</b>               | 32                | from 64 to 32                        | 2                 |
| COL*        | 0.0625                         | from 128 to 64                       | 2                 | -                                    | no effect         |
| Mu50*       | 0.0625                         | from 256 to 64                       | 2                 | from 32 to 16                        | 2                 |

\*MRSA strain; values in bold correspond to a restoration of OXA activity against MRSA.

**Table S12.** Effect of compound **14** on MICs of OXA and AMP against *S. aureus* clinical isolates.

| OXA         |                                |                                      |                   | AMP                                  |                   |
|-------------|--------------------------------|--------------------------------------|-------------------|--------------------------------------|-------------------|
| Strain      | Concentration of compound [mM] | Numerical value of reduction [μg/ml] | Activity gain [A] | Numerical value of reduction [μg/ml] | Activity gain [A] |
| MM-O058     | 0.0625                         | -                                    | 2                 | from 8 to 4                          | 2                 |
| MM-N072     | 0.0625                         | -                                    | 2                 | from 32 to 16                        | 2                 |
| LG-N017*    | 0.0625                         | <b>from 12 to 2</b>                  | 6                 | -                                    | no effect         |
| MM-O021*    | 0.0625                         | from 48 to 12                        | 4                 | -                                    | no effect         |
| R45-CC45*   | 0.0625                         | <b>from 4 to 1</b>                   | 4                 | -                                    | no effect         |
| R46-CC22*   | 0.0625                         | -                                    | no effect         | from 32 to 24                        | 1.5               |
| USA300 LAC* | 0.0625                         | <b>from 12 to 2</b>                  | 6                 | -                                    | no effect         |
| 5328*       | 0.0625                         | <b>from 4 to 1.5</b>                 | 2.7               | -                                    | no effect         |
| COL*        | 0.0625                         | -                                    | no effect         | -                                    | no effect         |
| Mu50*       | 0.0625                         | from 256 to 128                      | 2                 | -                                    | no effect         |

\*MRSA strain; values in bold correspond to a restoration of OXA activity against MRSA.

**Table S13.** Effect of compound **15** on MICs of OXA and AMP against *S. aureus* clinical isolates.

| OXA         |                                |                                      |                   | AMP                                  |                   |
|-------------|--------------------------------|--------------------------------------|-------------------|--------------------------------------|-------------------|
| Strain      | Concentration of compound [mM] | Numerical value of reduction [μg/ml] | Activity gain [A] | Numerical value of reduction [μg/ml] | Activity gain [A] |
| MM-O058     | 0.0625                         | -                                    | no effect         | -                                    | no effect         |
| MM-N072     | 0.0625                         | -                                    | no effect         | -                                    | no effect         |
| LG-N017*    | 0.0625                         | -                                    | no effect         | -                                    | no effect         |
| MM-O021*    | 0.0625                         | -                                    | no effect         | -                                    | no effect         |
| R45-CC45*   | 0.0625                         | -                                    | -                 | -                                    | no effect         |
| R46-CC22*   | 0.0625                         | -                                    | no effect         | -                                    | no effect         |
| USA300 LAC* | 0.0625                         | from 12 to 8                         | 1.5               | -                                    | no effect         |

|       |        |   |           |   |           |
|-------|--------|---|-----------|---|-----------|
| 5328* | 0.0625 | - | no effect | - | no effect |
| COL*  | 0.0625 | - | no effect | - | no effect |
| Mu50* | 0.0625 | - | no effect | - | no effect |

\*MRSA strain

**Table S14.** Effect of compound **16** on MICs of OXA and AMP against *S. aureus* strains.

| Strain      | Concentration of compound [mM] | OXA                                  |                   | AMP                                  |                   |
|-------------|--------------------------------|--------------------------------------|-------------------|--------------------------------------|-------------------|
|             |                                | Numerical value of reduction [µg/ml] | Activity gain [A] | Numerical value of reduction [µg/ml] | Activity gain [A] |
| MM-O058     | 0.03125                        | -                                    | no effect         | -                                    | no effect         |
|             | 0.0625                         | -                                    | no effect         | -                                    | no effect         |
| MM-N072     | 0.03125                        | -                                    | no effect         | -                                    | no effect         |
|             | 0.0625                         | -                                    | no effect         | -                                    | no effect         |
| LG-N017*    | 0.03125                        | -                                    | no effect         | -                                    | no effect         |
|             | 0.0625                         | -                                    | no effect         | -                                    | no effect         |
| MM-O021*    | 0.03125                        | -                                    | no effect         | -                                    | no effect         |
|             | 0.0625                         | -                                    | no effect         | -                                    | no effect         |
| R45-CC45*   | 0.03125                        | -                                    | no effect         | -                                    | no effect         |
|             | 0.0625                         | -                                    | no effect         | -                                    | no effect         |
| R46-CC22*   | 0.03125                        | -                                    | no effect         | -                                    | no effect         |
|             | 0.0625                         | -                                    | no effect         | -                                    | no effect         |
| USA300 LAC* | 0.03125                        | -                                    | no effect         | -                                    | no effect         |
|             | 0.0625                         | -                                    | no effect         | -                                    | no effect         |
| 5328*       | 0.03125                        | -                                    | no effect         | -                                    | no effect         |
|             | 0.0625                         | -                                    | no effect         | -                                    | no effect         |
| COL*        | 0.03125                        | -                                    | no effect         | -                                    | no effect         |
|             | 0.0625                         | -                                    | no effect         | -                                    | no effect         |
| Mu50*       | 0.03125                        | -                                    | no effect         | -                                    | no effect         |
|             | 0.0625                         | -                                    | no effect         | -                                    | no effect         |

\*MRSA strain

**Table S15.** Effect of compound **17** on MICs of OXA and AMP against *S. aureus* strains.

| Strain      | Concentration of compound [mM] | OXA                                  |                   | AMP                                  |                   |
|-------------|--------------------------------|--------------------------------------|-------------------|--------------------------------------|-------------------|
|             |                                | Numerical value of reduction [µg/ml] | Activity gain [A] | Numerical value of reduction [µg/ml] | Activity gain [A] |
| MM-O058     | 0.03125                        | -                                    | no effect         | -                                    | no effect         |
|             | 0.0625                         | -                                    | no effect         | -                                    | no effect         |
| MM-N072     | 0.03125                        | -                                    | no effect         | -                                    | no effect         |
|             | 0.0625                         | -                                    | no effect         | -                                    | no effect         |
| LG-N017*    | 0.03125                        | -                                    | no effect         | -                                    | no effect         |
|             | 0.0625                         | -                                    | no effect         | -                                    | no effect         |
| MM-O021*    | 0.03125                        | -                                    | no effect         | -                                    | no effect         |
|             | 0.0625                         | -                                    | no effect         | -                                    | no effect         |
| R45-CC45*   | 0.03125                        | -                                    | no effect         | -                                    | no effect         |
|             | 0.0625                         | -                                    | no effect         | -                                    | no effect         |
| R46-CC22*   | 0.03125                        | -                                    | no effect         | -                                    | no effect         |
|             | 0.0625                         | -                                    | no effect         | -                                    | no effect         |
| USA300 LAC* | 0.03125                        | -                                    | no effect         | -                                    | no effect         |
|             | 0.0625                         | -                                    | no effect         | -                                    | no effect         |
| 5328*       | 0.03125                        | -                                    | no effect         | -                                    | no effect         |

|       |         |   |           |   |           |
|-------|---------|---|-----------|---|-----------|
|       | 0.0625  | - | no effect | - | no effect |
| COL*  | 0.03125 | - | no effect | - | no effect |
|       | 0.0625  | - | no effect | - | no effect |
| Mu50* | 0.03125 | - | no effect | - | no effect |
|       | 0.0625  | - | no effect | - | no effect |

\*MRSA strain

**Table S16.** Effect of compound **18** on MICs of OXA and AMP against *S. aureus* strains.

| Strain      | Concentration of compound [mM] | OXA                                  |                   | AMP                                  |                   |
|-------------|--------------------------------|--------------------------------------|-------------------|--------------------------------------|-------------------|
|             |                                | Numerical value of reduction [µg/ml] | Activity gain [A] | Numerical value of reduction [µg/ml] | Activity gain [A] |
| MM-O058     | 0.03125                        | -                                    | no effect         | from 8 to 4                          | 2                 |
|             | 0.0625                         | -                                    | no effect         | from 8 to 4                          | 2                 |
| MM-N072     | 0.03125                        | -                                    | no effect         | from 32 to 16                        | 2                 |
|             | 0.0625                         | -                                    | no effect         | from 32 to 16                        | 2                 |
| LG-N017*    | 0.03125                        | <b>from 12 to 0.5</b>                | 24                | from 16 to 8                         | 2                 |
|             | 0.0625                         | <b>from 12 to 0.25</b>               | 48                | from 16 to 4                         | 4                 |
| MM-O021*    | 0.03125                        | from 48 to 16                        | 3                 | from 128 to 64                       | 2                 |
|             | 0.0625                         | from 48 to 4                         | 12                | from 128 to 64                       | 2                 |
| R45-CC45*   | 0.03125                        | <b>from 4 to 1</b>                   | 4                 | from 48 to 16                        | 3                 |
|             | 0.0625                         | <b>from 4 to 0.25</b>                | 16                | from 48 to 8                         | 6                 |
| R46-CC22*   | 0.03125                        | <b>from 64 to 2</b>                  | 32                | -                                    | no effect         |
|             | 0.0625                         | <b>from 64 to 1</b>                  | 64                | -                                    | no effect         |
| USA300 LAC* | 0.03125                        | <b>from 12 to 0.5</b>                | 24                | -                                    | no effect         |
|             | 0.0625                         | <b>from 12 to 0.25</b>               | 48                | from 64 to 16                        | 4                 |
| 5328*       | 0.03125                        | -                                    | no effect         | from 64 to 32                        | 2                 |
|             | 0.0625                         | -                                    | no effect         | from 64 to 16                        | 4                 |
| COL*        | 0.03125                        | -                                    | no effect         | -                                    | no effect         |
|             | 0.0625                         | -                                    | no effect         | -                                    | no effect         |
| Mu50*       | 0.03125                        | from 256 to 32                       | 8                 | -                                    | no effect         |
|             | 0.0625                         | from 256 to 8                        | 32                | from 32 to 16                        | 2                 |

\*MRSA strain; values in bold correspond to a restoration of OXA activity against MRSA.

**Table S17.** Effect of compound **19** on MICs of OXA and AMP against *S. aureus* strains.

| Strain      | Concentration of compound [mM] | OXA                                  |                   | AMP                                  |                   |
|-------------|--------------------------------|--------------------------------------|-------------------|--------------------------------------|-------------------|
|             |                                | Numerical value of reduction [µg/ml] | Activity gain [A] | Numerical value of reduction [µg/ml] | Activity gain [A] |
| MM-O058     | 0.0625                         | -                                    | no effect         | -                                    | no effect         |
|             | 0.125                          | -                                    | no effect         | -                                    | no effect         |
| MM-N072     | 0.0625                         | -                                    | no effect         | -                                    | no effect         |
|             | 0.125                          | -                                    | no effect         | -                                    | no effect         |
| LG-N017*    | 0.0625                         | -                                    | no effect         | -                                    | no effect         |
|             | 0.125                          | -                                    | no effect         | -                                    | no effect         |
| MM-O021*    | 0.0625                         | -                                    | no effect         | -                                    | no effect         |
|             | 0.125                          | -                                    | no effect         | -                                    | no effect         |
| R45-CC45*   | 0.0625                         | -                                    | no effect         | -                                    | no effect         |
|             | 0.125                          | -                                    | no effect         | -                                    | no effect         |
| R46-CC22*   | 0.0625                         | -                                    | no effect         | -                                    | no effect         |
|             | 0.125                          | -                                    | no effect         | -                                    | no effect         |
| USA300 LAC* | 0.0625                         | -                                    | no effect         | -                                    | no effect         |
|             | 0.125                          | -                                    | no effect         | -                                    | no effect         |

|       |        |   |           |   |           |
|-------|--------|---|-----------|---|-----------|
| 5328* | 0.0625 | - | no effect | - | no effect |
|       | 0.125  | - | no effect | - | no effect |
| COL*  | 0.0625 | - | no effect | - | no effect |
|       | 0.125  | - | no effect | - | no effect |
| Mu50* | 0.0625 | - | no effect | - | no effect |
|       | 0.125  | - | no effect | - | no effect |

\*MRSA strain

**Table S18.** Effect of compound **20** on MICs of OXA and AMP against *S. aureus* strains.

| Strain      | Concentration of compound [mM] | OXA                                  |                   | AMP                                  |                   |
|-------------|--------------------------------|--------------------------------------|-------------------|--------------------------------------|-------------------|
|             |                                | Numerical value of reduction [µg/ml] | Activity gain [A] | Numerical value of reduction [µg/ml] | Activity gain [A] |
| MM-O058     | 0.03125                        | -                                    | no effect         | from 8 to 4                          | 2                 |
|             | 0.0625                         | -                                    | no effect         | from 8 to 4                          | 2                 |
| MM-N072     | 0.03125                        | -                                    | no effect         | from 32 to 16                        | 2                 |
|             | 0.0625                         | -                                    | no effect         | from 32 to 16                        | 2                 |
| LG-N017*    | 0.03125                        | <b>from 12 to 0.5</b>                | 24                | from 16 to 8                         | 2                 |
|             | 0.0625                         | <b>from 12 to 0.375</b>              | 32                | from 16 to 6                         | 2.7               |
| MM-O021*    | 0.03125                        | from 48 to 32                        | 1.5               | from 128 to 64                       | 2                 |
|             | 0.0625                         | from 48 to 32                        | 1.5               | from 128 to 64                       | 2                 |
| R45-CC45*   | 0.03125                        | <b>from 4 to 0.25</b>                | 16                | from 48 to 16                        | 3                 |
|             | 0.0625                         | <b>from 4 to 0.125</b>               | 32                | from 48 to 8                         | 6                 |
| R46-CC22*   | 0.03125                        | <b>from 64 to 1</b>                  | 64                | -                                    | no effect         |
|             | 0.0625                         | <b>from 64 to 0.5</b>                | 128               | -                                    | no effect         |
| USA300 LAC* | 0.03125                        | <b>from 12 to 0.5</b>                | 24                | from 64 to 32                        | 2                 |
|             | 0.0625                         | <b>from 12 to 0.375</b>              | 32                | from 64 to 32                        | 2                 |
| 5328*       | 0.03125                        | -                                    | no effect         | -                                    | no effect         |
|             | 0.0625                         | -                                    | no effect         | -                                    | no effect         |
| COL*        | 0.03125                        | -                                    | no effect         | -                                    | no effect         |
|             | 0.0625                         | -                                    | no effect         | -                                    | no effect         |
| Mu50*       | 0.03125                        | from 256 to 32                       | 8                 | -                                    | no effect         |
|             | 0.0625                         | from 256 to 8                        | 32                | -                                    | no effect         |

\*MRSA strain; values in bold correspond to a restoration of OXA activity against MRSA.

**Table S19.** Effect of compound **21** on MICs of OXA and AMP against *S. aureus* strains.

| Strain      | Concentration of compound [mM] | OXA                                  |                   | AMP                                  |                   |
|-------------|--------------------------------|--------------------------------------|-------------------|--------------------------------------|-------------------|
|             |                                | Numerical value of reduction [µg/ml] | Activity gain [A] | Numerical value of reduction [µg/ml] | Activity gain [A] |
| MM-O058     | 0.125                          | -                                    | no effect         | -                                    | no effect         |
|             | 0.25                           | -                                    | no effect         | -                                    | no effect         |
| MM-N072     | 0.125                          | -                                    | no effect         | -                                    | no effect         |
|             | 0.25                           | -                                    | no effect         | -                                    | no effect         |
| LG-N017*    | 0.125                          | -                                    | no effect         | -                                    | no effect         |
|             | 0.25                           | -                                    | no effect         | -                                    | no effect         |
| MM-O021*    | 0.125                          | -                                    | no effect         | -                                    | no effect         |
|             | 0.25                           | -                                    | no effect         | -                                    | no effect         |
| R45-CC45*   | 0.125                          | -                                    | no effect         | -                                    | no effect         |
|             | 0.25                           | -                                    | no effect         | -                                    | no effect         |
| R46-CC22*   | 0.125                          | -                                    | no effect         | -                                    | no effect         |
|             | 0.25                           | -                                    | no effect         | -                                    | no effect         |
| USA300 LAC* | 0.125                          | -                                    | no effect         | -                                    | no effect         |
|             | 0.25                           | -                                    | no effect         | -                                    | no effect         |

|       |       |   |           |   |           |
|-------|-------|---|-----------|---|-----------|
| 5328* | 0.125 | - | no effect | - | no effect |
|       | 0.25  | - | no effect | - | no effect |
| COL*  | 0.125 | - | no effect | - | no effect |
|       | 0.25  | - | no effect | - | no effect |
| Mu50* | 0.125 | - | no effect | - | no effect |
|       | 0.25  | - | no effect | - | no effect |

\*MRSA strain

**Table S20.** Effect of compound **18** and **20** on MICs of ERY against *S. aureus* strains.

| Strain      | Concentration of compound [mM] | Cpd 18                               |                   | Cpd 20                               |                   |
|-------------|--------------------------------|--------------------------------------|-------------------|--------------------------------------|-------------------|
|             |                                | Numerical value of reduction [µg/ml] | Activity gain [A] | Numerical value of reduction [µg/ml] | Activity gain [A] |
| MM-O058*    | 0.03125                        | -                                    | no effect         | -                                    | no effect         |
|             | 0.0625                         | -                                    | no effect         | -                                    | no effect         |
| MM-N072*    | 0.03125                        | -                                    | no effect         | -                                    | no effect         |
|             | 0.0625                         | -                                    | no effect         | -                                    | no effect         |
| LG-N017*    | 0.03125                        | from 8 to 4                          | 2                 | <b>from 8 to 1</b>                   | 8                 |
|             | 0.0625                         | from 8 to 4                          | 4                 | <b>from 8 to 1</b>                   | 8                 |
| MM-O021*    | 0.03125                        | -                                    | no effect         | -                                    | no effect         |
|             | 0.0625                         | -                                    | no effect         | -                                    | no effect         |
| R45-CC45    | 0.03125                        | -                                    | no effect         | -                                    | no effect         |
|             | 0.0625                         | -                                    | no effect         | -                                    | no effect         |
| R46-CC22    | 0.03125                        | -                                    | no effect         | -                                    | no effect         |
|             | 0.0625                         | -                                    | no effect         | -                                    | no effect         |
| USA300 LAC* | 0.03125                        | from 64 to                           | 3                 | from 64 to 4                         | 16                |
|             | 0.0625                         | from 64 to 12                        | 5.3               | from 64 to 2                         | 32                |
| 5328*       | 0.03125                        | -                                    | no effect         | -                                    | no effect         |
|             | 0.0625                         | -                                    | no effect         | -                                    | no effect         |
| COL*        | 0.03125                        | -                                    | no effect         | -                                    | no effect         |
|             | 0.0625                         | -                                    | no effect         | -                                    | no effect         |
| Mu50*       | 0.03125                        | -                                    | no effect         | -                                    | no effect         |
|             | 0.0625                         | -                                    | no effect         | -                                    | no effect         |

## Safety studies

### AMES test

**Table S21.** Mutagenic index (**MI**) and other values for doxorubicin (reference compound) and compound **13**.

| Compound  | Mutagenicity at 1 $\mu$ M concentration |                             |        |      | Mutagenicity at 10 $\mu$ M concentration |                             |      |      |
|-----------|-----------------------------------------|-----------------------------|--------|------|------------------------------------------|-----------------------------|------|------|
|           | MI                                      | Fold increase over baseline | B      | SD   | MI                                       | Fold increase over baseline | B    | SD   |
| DOXO      | 1.64                                    | 1.31                        | 1.00   | 1.00 | 0.95                                     | 0.77                        | 0.46 | 3.61 |
| <b>13</b> | 0.45                                    | 0.43                        | 0.01 C | 0.58 | 0.55                                     | 0.51                        | 0.01 | 4.58 |

(Mutagenic index) MI = mean revertant value for compound tested/mean revertant value for the blind probe with DMSO; compound is considered to be mutagenic if  $MI \geq 2$ ; baseline = mean + 1 SD, B – the binomial B value indicates the probability that spontaneous mutation events alone produce at most n = total number of yellow wells at a given concentration of the test sample (3 x 48 wells); a binomial B-value  $\geq 0.99$  indicates that chances are  $\leq 1\%$  that this result occurs due to spontaneous mutation; data points that are significantly smaller ( $B \leq 0.01$ ) than the mean number of spontaneous revertants are labelled as C “cytotoxic effect”. Compound is mutagenic if data points with fold increase  $\geq 2$  and Binomial B-value  $\geq 0.99$ .
